# Supplementary material for: Ovariectomy uncouples lifespan from metabolic health and reveals a sex-hormone-dependent role of hepatic mTORC2 in aging
Source: eLife. 2020 Jul 28;9:e56177. doi: 10.7554/eLife.56177 (PMC7386906; doi:10.7554/eLife.56177)
Supplement: Supplementary file 1. — Supplementary Table S1: Survival of mice plotted in Figures 1A and 2A. Supplementary Table S2: Survival of mice plotted in Figures 1B and 2B. Supplementary Table S3: Survival of male mice plotted in Figure 1C. 22 animals were removed for a cross-sectional analysis and censored (‘0’). Supplementary Table S4: Survival of female mice plotted in Figure 2C. 23 animals were removed for a cross-sectional analysis and censored (‘0’); one additional animal was last recorded at 592 days and censored at that age. [file elife-56177-supp1.xlsx]

## Sheet: Table S1
Supplemental Table 1
Males - cancer observed						Females - cancer observed
lifespan	Sham wt M	Sham KO M	Cast. wt M	Cast. KO M		lifespan	Sham wt F	Sham KO F	Ovar. wt F	Ovar. KO F
843				1		1013				1
1199				1		1207				1
1115				1		729				1
1047				1		659				1
651				1		508				1
448				1		772				1
654				1		954				1
801				1		857		1
685				1		703		1
916				1		980		1
908				1		547		1
686				1		583		1
1071				1		1002		1
1031				1		874		1
549		1				728		1
1059		1				896		1
1085		1				829			1
930		1				744			1
414		1				400			1
504		1				1042			1
868		1				825			1
837		1				968			1
1182		1				797			1
1020			1			1058			1
750			1			577			1
772			1			886			1
881			1			840	1
1159			1			843	1
1019			1			829	1
862			1			523	1
966			1			640	1
414			1			937	1
881			1			857	1
843	1					822	1
680	1					707	1
1102	1					933	1
982	1					896	1
1102	1

## Sheet: Table S2
Supplemental Table 2
Males - cancer not observed						Females - cancer not observed
lifespan	Sham wt M	Sham KO M	Cast. wt M	Cast. KO M		lifespan	Sham wt F	Sham KO F	Ovar. wt F	Ovar. KO F
907	1					1005	1
1126	1					830	1
1046	1					576	1
1080	1					904	1
1080	1					1105	1
875	1					758	1
860	1					888	1
878		1				701	1
949		1				1020	1
940		1				894	1
1008		1				896	1
536		1				864		1
832		1				659		1
826		1				508		1
838		1				458		1
563		1				854		1
865		1				690		1
1004		1				421		1
812			1			798		1
762			1			675			1
1040			1			933			1
1117			1			897			1
978			1			977			1
1050			1			403			1
980			1			987			1
1103			1			1082			1
1075			1			1079				1
871			1			872				1
963			1			872				1
897				1		809				1
798				1		726				1
861				1		934				1
						1072				1
						987				1
						872				1
						934				1

## Sheet: Table S3
Supplemental Table 3
Males
lifespan	Sham wt M	Sham KO M	Cast. wt M	Cast. KO M		lifespan	Sham wt M	Sham KO M	Cast. wt M	Cast. KO M	note
1071				1		963			1
1031				1		978			1
853				1		1020			1
843				1		1019			1
798				1		1040			1
861				1		1050			1
801				1		980			1
686				1		1103			1
685				1		1075			1
654				1		1095			1
651				1		1159			1
448				1		966			1
895				1		1251	1
916				1		1102	1
897				1		1233	1
908				1		860	1
1115				1		843	1
1047				1		680	1
880				1		875	1
903				1		907	1
1199				1		982	1
878		1				1009	1
865		1				1002	1
837		1				997	1
826		1				1126	1
838		1				1046	1
832		1				1080	1
414		1				1080	1
549		1				920	1
536		1				1158	1
504		1				461	0				cross-sectional study
563		1				461	0				cross-sectional study
930		1				437	0				cross-sectional study
868		1				437	0				cross-sectional study
949		1				444	0				cross-sectional study
940		1				461		0			cross-sectional study
1004		1				437		0			cross-sectional study
1008		1				437		0			cross-sectional study
1059		1				444		0			cross-sectional study
1085		1				444		0			cross-sectional study
1182		1				373		0			cross-sectional study
1117			1			373		0			cross-sectional study
1086			1			458			0		cross-sectional study
881			1			463			0		cross-sectional study
871			1			430			0		cross-sectional study
812			1			430			0		cross-sectional study
762			1			419			0		cross-sectional study
772			1			458				0	cross-sectional study
687			1			463				0	cross-sectional study
414			1			430				0	cross-sectional study
750			1			419				0	cross-sectional study
881			1			416				0	cross-sectional study
862			1

## Sheet: Table S4
Supplemental Table 4
Females
lifespan	Sham wt F	Sham KO F	Ovar. wt F	Ovar. KO F		lifespan	Sham wt F	Sham KO F	Ovar. wt F	Ovar. KO F	note
1207				1		1042			1
1066				1		968			1
1079				1		987			1
1013				1		1082			1
934				1		937			1
809				1		916			1
726				1		1215			1
659				1		1029	1
729				1		997	1
739				1		1005	1
508				1		776	1
872				1		888	1
872				1		794	1
872				1		840	1
772				1		843	1
954				1		830	1
955				1		758	1
934				1		640	1
1072				1		707	1
987				1		576	1
1045				1		523	1
1127		1				896	1
1127		1				829	1
874		1				933	1
864		1				894	1
857		1				896	1
798		1				937	1
647		1				1020	1
703		1				701	1
728		1				857	1
659		1				822	1
583		1				853	1
421		1				904	1
547		1				1105	1
508		1				463	0				cross-sectional study
458		1				442	0				cross-sectional study
980		1				435	0				cross-sectional study
854		1				442	0				cross-sectional study
805		1				463		0			cross-sectional study
1002		1				463		0			cross-sectional study
690		1				442		0			cross-sectional study
896		1				435		0			cross-sectional study
577			1			414		0			cross-sectional study
829			1			414		0			cross-sectional study
825			1			435		0			cross-sectional study
744			1			468			0		cross-sectional study
400			1			468			0		cross-sectional study
675			1			460			0		cross-sectional study
403			1			460			0		cross-sectional study
886			1			435			0		cross-sectional study
832			1			468				0	cross-sectional study
797			1			468				0	cross-sectional study
955			1			460				0	cross-sectional study
933			1			460				0	cross-sectional study
897			1			435				0	cross-sectional study
977			1			435				0	cross-sectional study
1058			1			435				0	cross-sectional study
						592		0			missing
